# Supplementary material for: Annual mass changes for each glacier in the world from 1976 to 2023
Source: Copernicus journal article supplement (doi:10.5194/essd-2024-323), 2024-08-12
Supplement: Supplementary file [file essd-2024-323-AC3-supplement.pdf]

## Reply to reviewer #1

We are very thankful for the anonymous reviewer's detailed and thorough analysis of our dataset and constructive review of our manuscript. Most of their suggestions have been considered in our revised manuscript. We acknowledge that the proposed changes have made the dataset more robust on its algorithm and uncertainty assessment and the revised manuscript clearer and better expressing the strengths and limitations of the dataset to potential users. We here respond point by point to all major and specific concerns raised by reviewer #1.

The document is color coded as follows:

**Black: reviewer comment**

**Green: answers to reviewer**

**Blue: extracts from the revised manuscript**

This study combines in-situ glaciological annual mass-balance observations with remotely sensed surface elevation data to provide an annual time series of individual glacier mass changes over the last decades to a century. Based on the assumption that glacier mass-balance anomalies are similar between neighbouring glaciers, annual observed glaciological mass-balance anomalies are extrapolated to all glaciers globally. These anomalies are combined with several geodetic samples to calibrate a mean annual mass change time series and its respective uncertainties.

This extensive data merging and extrapolation study presents an interesting analysis. However, major revisions are necessary before the publication of this dataset to avoid potential misuse by future users.

First of all, there are several major issues, questions and obscurities in the approach of how the uncertainties were estimated (see Sect. 1.1, 1.2) and how the cross-validation was done and analysed (see Sect. 1.3). Another critical aspect is the missing discussion about uncertainties at the glacier scale in the paper itself. The large per-glacier uncertainties become apparent only by checking the dataset itself. Many data users might not be able to use the per-glacier dataset as the uncertainties surpass the signal in many cases (see Sect. 1.4, Sect. 1.5).

Another essential aspect is to communicate clearly that this dataset is not a purely observed dataset since it was created by extrapolation. When extrapolating, predictions are made about unobserved glaciers/years based on an underlying assumption or rule. This dataset is based upon a model of belief of how the system behaves. Upon publication on the WGMS website, the dataset might be misused and falsely interpreted as observations. Most data users neglect or do not include the uncertainties in their frameworks. Therefore, it is important that data providers clearly state the limitations of their dataset. It may imply, for example, adapting the title and the analysis (see Sect. 1.6), and also "flagging" respective regions or glaciers by adding some "metadata" to the data (see Sect. 1.7). In general, the manuscript should focus much more on the uncertainties that vary regionally and temporally and showcase for what use case the data can be used and for what the data might not be useful.

There are several steps in the manuscript that I find unclear, particularly concerning the statistical analysis. I believe these issues need to be addressed by the author team and eventually reviewed by a statistical expert (if not already done). Additionally, the paper and data require a substantial rewrite before they can be reviewed properly. Consequently, I am only able to partially evaluate the manuscript and the dataset at this time. Only a revised version that incorporates or addresses my comments will enable me to fully assess the study and the dataset's added value.

My major comments are summarised in the 'General Comments' (Sect. 1). Line-by-line comments are in the 'Specific comments' (Sect. 2). After each manuscript section, the respective figures and tables and their captions are commented there as well.

## General comments

### 1.1 Standard error

The manuscript uses two times the standard error as the uncertainty measure for the glacier mass balance anomalies. The standard error of the mean describes the uncertainty in estimating the mean, essentially providing the precision of the mean. In contrast, the standard deviation describes the variability of individual points around the mean, indicating the spread of the mass-balance anomalies. This distinction is visually explained on the following website: [https://seaborn.pydata.org/tutorial/error\\_bars.html](https://seaborn.pydata.org/tutorial/error_bars.html). In this context, the standard deviation would indicate how much the glacier anomalies deviate from their mean across different locations and years, which is likely of primary interest to data users. Using the standard error because it "allows" years with more observations to have smaller uncertainties is, to my knowledge, an uncommon approach.

As the reviewer correctly defines, the standard error of the mean describes the uncertainty in estimating the mean, while the standard deviation can refer to any measure of sample variability or spread. However, it seems unclear to the reviewer that the two terminologies are not mutually exclusive. By definition, the standard error is also a standard deviation, namely the standard deviation of all possible means. During uncertainty analysis, a standard deviation implicitly refers to the associated estimate (which can be a mean, or other), and is thus always a measure of uncertainty. We confirm that this is also the case everywhere in our study.

We agree with the reviewer that the justification of our uncertainty methods was sometimes convoluted, and that the language was sometimes inconsistent. In the revised document, we now explain the methods more clearly keeping a consistent language. We relate the uncertainties to their physical meaning for a new source, and justify how they propagate from other sources.

Additionally, the standard deviation appears to be used later for other uncertainties (e.g.,  $\sigma_{B_{glac}}$ , density conversion factor uncertainty). The uncertainties are combined by adding the standard error and standard deviation together, which is probably also not a standard practice. Are there references that justify the approaches described in this paragraph?

We refer to the answer above on the fact that standard error and standard deviation are not mutually exclusive, and instead refer to the same concept in uncertainty analysis. Standard deviations always refer to the variability of the estimate (whether it is a mean of samples, a modelling estimate, a temporal or spatial sum for aggregating to larger regions).

For instance, the uncertainty in density conversion of Huss (2013) mentioned by the reviewer is a standard deviation of estimates of density conversions, derived from a modeling exercise. As we do not have any other prior knowledge and use a constant mean density conversion globally, also corresponding to Huss (2013), this standard deviation corresponds to our uncertainty in density conversion at the glacier scale.

The equation in line 193 is unclear and raises further confusion. The equation states that the uncertainty is two times the sum of the different standard deviations of the individual  $N$  selected annual glacier mass balance anomalies, divided by the square root of the number of observations. It appears these uncertainties correspond to the individual lines in Fig. 2b. However, it is unclear why a standard deviation is calculated for each glacier anomaly ( $i$ ), which is then summed. Additionally, the explanation provided in the text (line 188) does not seem to align with the equation on line 193. To clarify, the code was briefly reviewed at [https://github.com/idussa/mb\\_data\\_crunching/blob/c9ab8e10198583d0cb2fc1de809e01e4bd5fbca3/2.1\\_spatial\\_anomalies/calc\\_global\\_gla\\_spatial\\_anom.py#L505](https://github.com/idussa/mb_data_crunching/blob/c9ab8e10198583d0cb2fc1de809e01e4bd5fbca3/2.1_spatial_anomalies/calc_global_gla_spatial_anom.py#L505). Based on this, it seems the standard deviation is computed over the observations, not summed, which conflicts with the equation in line 193. The code then appears to calculate a mean over another variable. It also seems that the error is first calculated for every "line" shown in Fig. 2c, leading to an average in the script. However, there does

not appear to be any summation applied, suggesting a possible discrepancy in the equation on line 193 or a misunderstanding of the correct line of code. Please clarify this process. Moreover, the rationale behind using a factor of two for the standard error is unclear. Please clarify the reasoning behind this choice (described further in Sect. 1.3).

The issue in Equation 4 raised here by the reviewer is no longer relevant since we decided to replace the inverse-distance weighting (IDW) spatial interpolation (for which there is no integrated error propagation) by a kriging spatial interpolation (that includes error propagation natively). This is explained further below.

Another point of concern is that the current approach results in glacier mass-balance (MB) anomaly uncertainties that only depend on the amount of included glaciers and their differences in the anomaly. I suggest that a mass balance anomaly from a glacier located further away results in larger uncertainties compared to one that is nearer. Is this accounted for in the uncertainty estimates? Do the uncertainties increase if only distant glaciers are available? In some cases, this might occur naturally if the distant glaciers are not clustered, leading to significant differences in MB anomalies and, consequently larger uncertainties. However, if the available glaciers with MB time series are far away but clustered closely together, could the assessed uncertainties be underestimated? Is there any algorithm in place to prevent this potential underestimation?

We agree with the referee that our methodology lacks a way to capture the varying errors with distance to the measurement used for interpolation. The uncertainty in the mean glacier mb-anomaly described in the submitted manuscript depended only on the number of glaciers included, their individual uncertainties, the distance of the selected anomalies used (inverse-distance weighting spatial interpolation, for which there is no integrated error propagation) and the differences of the individual glacier anomalies as standard error or a measure of the uncertainty in estimating the yearly means.

To solve this issue, we replaced the inverse-distance weighting (IDW) spatial interpolation with a kriging spatial interpolation. IDW was not the best suited method for an error-prone statistical analysis like ours because there is no integrated error propagation. Kriging instead, replaces the weight function by an empirically determined one based on the data covariance, and therefore natively supports error propagation. As stated in our preliminary answers (ESSD online discussion), we worried that the kriging implementation would not be sufficiently efficient computationally to run on our dataset in a reasonable time. However, not only did we successfully implement it but also, it provides a much robust estimation of both the mean annual mb-anomaly and its uncertainties. We refer to L182-L205, EQ 3 and 4 and Fig. 3 in the manuscript where the kriging method is explained.

Not only is kriging empirically-based (uses distance-weights that are not arbitrary but estimated from the data itself), it also provides robust errors that vary with the distance to measurements. For instance, a point interpolated right next to a measurement will have the same error as that of the measurement. In contrast, a point located further away than the maximum correlation length of the data from a measurement will have an error equal to the variability of the samples (maximum possible error). Additionally, kriging works best on second-order stationary data (stationary mean and variance), which is well verified in the case of our anomalies that are centered on zero, with similar variance within each region. For this reason, on this type of data, kriging is coined as the “best linear unbiased estimator”.

In summary:

- Kriging is known to provide robust theoretical errors under assumptions of stationarity solving the arbitrary uncertainties issue raised by the referee.
- Kriging depends on the distance to the observations, with larger errors further away from observations solving the distance-dependency of uncertainties raised by the referee.
- The Kriging distance-weight function is robust as it is empirical (estimated from the data), and based on covariance to minimize variance (thus coined “best unbiased interpolator”). Solving the issue of an arbitrary weight function.

As the reviewer suggests, in our revised dataset and manuscript we now make sure users are aware of where our dataset is better or less constrained, not only through the uncertainties but also through providing the necessary metadata. We additionally provide a clearer illustration of the results in the manuscript figures and discussion to flag the periods and regions where the dataset is less constrained. As an example: the reduced robustness of the mean calibrated time series during filled-up past years where neighboring glaciers have been used, are now evident not only because of their larger uncertainties, but also clearly delineated in the manuscript main Fig. 4 with grey lines and shading.

## 1.2 Uncertainties/Error propagation

For the analysis of per-glacier mass balance uncertainties, the law of random error propagation is frequently used. It would be beneficial to explain, in each instance, why it is considered valid to assume that the errors are completely uncorrelated. Specific examples where random error propagation might not be valid or should at least be discussed are noted in the specific comments (e.g., **L191**, **L255-257**, **L269**, **L276**, **L281**). It may also be necessary to mention that assuming complete independence could lead to underestimating the actual uncertainties.

We agree the text was not fully clear in showing where assumptions of correlation or no correlation are applied between sources, as we instead primarily focused on spatial correlations. The reason behind this difference in focus is that the assumption of correlation between sources has negligible impact compared to the spatial correlation of errors within the same source. This is because we only have 3 main sources of uncertainties, while we have 200,000 glaciers distributed spatially. For instance, for a sum (of volume changes), assuming for the sake of the example that all errors have the same magnitude, if 3 sources of errors are combined as uncorrelated or fully correlated affects the total uncertainty by a factor of  $3/\sqrt{3} = 1.7$ . For 200,000 glaciers, if errors are propagated spatially assuming they are uncorrelated or fully correlated, it affects the total uncertainty by a factor of  $200000/\sqrt{200000} = 447$ . This is why we focus on estimating spatial correlation to constrain errors more robustly in this study, while we put less energy in estimating the correlation between sources that has little impact.

Nonetheless, we edited the manuscript to clarify the physical meaning of each term and the justification behind assumptions of error propagation as either uncorrelated, fully correlated, or correlated to a certain degree (for spatial correlations) at every instance. Below, our response and/or new text to the five cases explicitly mentioned by reviewer #1 (L191, L255-257, L269, L276, L281)

### Case 1: referring to L191 in the previously submitted manuscript.

No longer relevant due to change to kriging

### Case 2: referring to L255-257 in the previously submitted manuscript.

We decided to keep this paragraph as is, since it explains that spatial correlation is considered between three error sources: elevation change, density conversion and annual anomaly prediction.

### Case 3: referring to L276 in the previously submitted manuscript.

New text, L297-L302 in the revised manuscript:

We propagate the uncertainty in the specific regional mass change, the uncertainty in the regional area (Paul et al., 2015) and the uncertainty in the area change considering them uncorrelated. Errors in the area stem mostly from remote sensing delineation errors, while errors in area change stem from a lack of multi-temporal outlines to constrain area change. They are largely uncorrelated with error sources described above for elevation change, glaciological measurements and anomalies. However, elevation change estimates usually already consider errors in area at the scale of each glacier, so we might conservatively be double counting these.

$$\sigma_{\Delta M_{R,Y}} = |\Delta M_{R,Y}| \sqrt{\left(\frac{\sigma_{B_{R,Y}}}{B_{R,Y}}\right)^2 + \left(\frac{\sigma_{S_R}}{S_R}\right)^2 + \left(\frac{\sigma_{\Delta S_{R,Y}}}{\Delta S_{R,Y}}\right)^2} \quad (19)$$

#### Case 4: referring to L281 in the previously submitted manuscript.

New text in L320-323 in the revised manuscript:

To simplify the combination of annual values into long term trends or cumulative annual values, we assume the yearly uncertainty to be independent of other years. This is true for glaciological measurement, having an independent uncertainty estimation for each individual year of the time series, but not for the elevation change measurements, where uncertainties are correlated over the years of the survey period.

Regarding **L269, eq. 16**, it is stated that the errors are assumed to be completely correlated at regional scales, but the equation suggests that complete independence is assumed (as indicated by summing the square roots). Which assumption was actually applied in the results? This was not clear from the code.

#### Case 5: referring to L269 in the previously submitted manuscript.

As explained above, we follow the assumption that correlation between sources has a negligible impact compared to the spatial correlation of errors within the same source. For this reason, we express that, after applying spatial correlation within error sources, we combine all sources of error propagated at the regional-scale as independent.

### 1.3 Leave-one-out cross validation

Applying a leave-one-out cross-validation is crucial, and it is great that this validation is performed by using geodetic data available for all glaciers. However, given the nature of the reference glaciers, there are concerns about the validity of the conclusions drawn, such as the claim in line 452 that the "leave-one-out cross-validation results prove that our algorithm can capture the annual variability of individual glaciers."

We clarified these claims in the revised manuscript making them less absolute.

As noted in lines 454-456, a major issue arises from the fact that the approach may work well for reference glaciers, often located in regions with nearby glaciers with mass-balance time series. Therefore, evaluating the metrics for these glaciers may not be representative. For example, removing Hintereisferner still leaves the nearby Kesselwandferner, which could skew the results. To provide robust estimates of the method's performance, a "data-denial/blocking" cross-validation approach is necessary. This involves analyzing how well the algorithm performs when assuming that, for instance, Hintereisferner has only one or two randomly selected glacier anomalies located far away, such as in the French Alps. Repeating this analysis across many glaciers and examining how the performance metrics change, as illustrated in Fig. 6, would provide a clearer understanding of the method's robustness. Additionally, evaluating how performance metrics vary with the number of considered glaciers would be valuable.

Please evaluate the approach with a larger glacier sample and the data-denial experiment to better demonstrate the dataset's robustness or non-robustness.

We appreciate the reviewer's idea, and we agree that performing a so-called "data-denial/blocking" cross-validation approach would add more insight into the robustness of our estimates. We performed this analysis and added the results in a new section in the revised manuscript: 5.3 Leave-block-out cross validation. For consistency with the literature on spatial statistics, we chose to use the term leave-block-out cross-validation analysis. The process is fully explained L514-L520, results are displayed in Fig. 9 and discussed in respective section in the revised manuscript.

The exercise is similar to the leave-one-out cross validation, with the difference that, instead of removing only the reference/benchmark glacier mass-balance time series, we remove all the glacier mass-balance time series surrounding the reference/benchmark glacier for increasing distances ranges. The mean and standard deviation of the residuals are calculated at every distance step, to assess potential systematic errors (with the

mean), and the magnitude of random errors (with the standard deviation). We performed this analysis over a sample of 74 reference and benchmark glaciers.

The revised manuscript states (L535-L544):

There is no apparent influence of the distance on systematic errors in the calculated glacier-wide leave-block-out mb justified by absence of trends in Fig. 9a. In these cases, the slight systematic errors will mostly depend on whether the reference series are reanalysed or not, and the quality of the elevation change used for calibration. As expected, random errors (residual  $S$ ) increases as the mean glacier anomaly is calculated from a more distant sample (Fig. 9b), from 0.5 m w.e. for nearby time series up to 1 m w.e. for series located farther than 2000 km. Importantly, in most cases both systematic and random errors are captured by the mean calibrated annual mass-change uncertainty at  $\sigma$  independent of the distance of the sample (Fig. 9c and 9d). This means that our predicted uncertainties reflect the true variability in the residuals, and that our model is providing realistic confidence intervals for the mean annual mass-balance anomaly predictions.  $S$  is larger than  $\sigma$  only in some few cases with distances to the closest glacier  $> 500\text{km}$ , but the large spread suggests this is coming from the randomness of the predictions.

Another consideration is the selection of glaciers for cross-validation. Why are e.g. Echaurren Norte and other WGMS reference or benchmark glaciers not chosen for the cross-validation? Including all glaciers with at least 10 years of observations could allow for a more comprehensive analysis, even if some glaciers have fewer years of data and are not validated. This inclusion would enable assessment in regions without reference glaciers and ensure that performance metrics are not skewed by a few well-sampled regions.

Glaciological time series are subject to biases inherent to the glaciological method. The WGMS highly recommends reference (+30 years) and benchmark (+10 years) glaciers glaciological time series to be reanalyzed every 10 years by calibrating them with long term trends derived from high resolution elevation change measurements (Zemp et al., 2013). We intentionally chose to perform the leave-one-out cross validation experiment with a selected list of reference and benchmark glaciers known to have been reanalyzed. These series stand as the only ground truth available for validation of our global assessment. The decision of not using all glaciological time series in the experiment was justified by reducing the risk of validating over potentially erroneous "truths".

There exist 74 reference and benchmark glaciers in the WGMS database, 32 of them are proven to be reanalyzed (those used in the previously submitted manuscript leave-one-out exercise). We now increased the sample of the leave-one-out and the leave-block-out cross validation to the 74 reference and benchmark glaciers.

Results for the leave-one-out cross validation experiment are summarized in Fig.7 and discussed in section 5.2 of the revised manuscript. The revised figure 8 is now divided into two, Fig. 8.1 comparing the leave-one-out cross validation results on selected reference glaciers ( $>30$  years of data), and Fig. 8.2 comparing the leave-one-out cross validation results on selected benchmark glaciers ( $>10$  years of data).

We note that we changed the measured statistics in all figures to the Mean error (ME) and standard deviation of the residuals ( $S$ ) between the calculated leave-one-out cross validation time series, as response to some confusion in the parameters chosen and other concerns raised by referee #1 that will be discussed later in this document.

We add here the same as Fig.6 but considering only the reanalyzed glaciers ( $n=32$ ) for the referee and editor to confirm how little statistics differ.



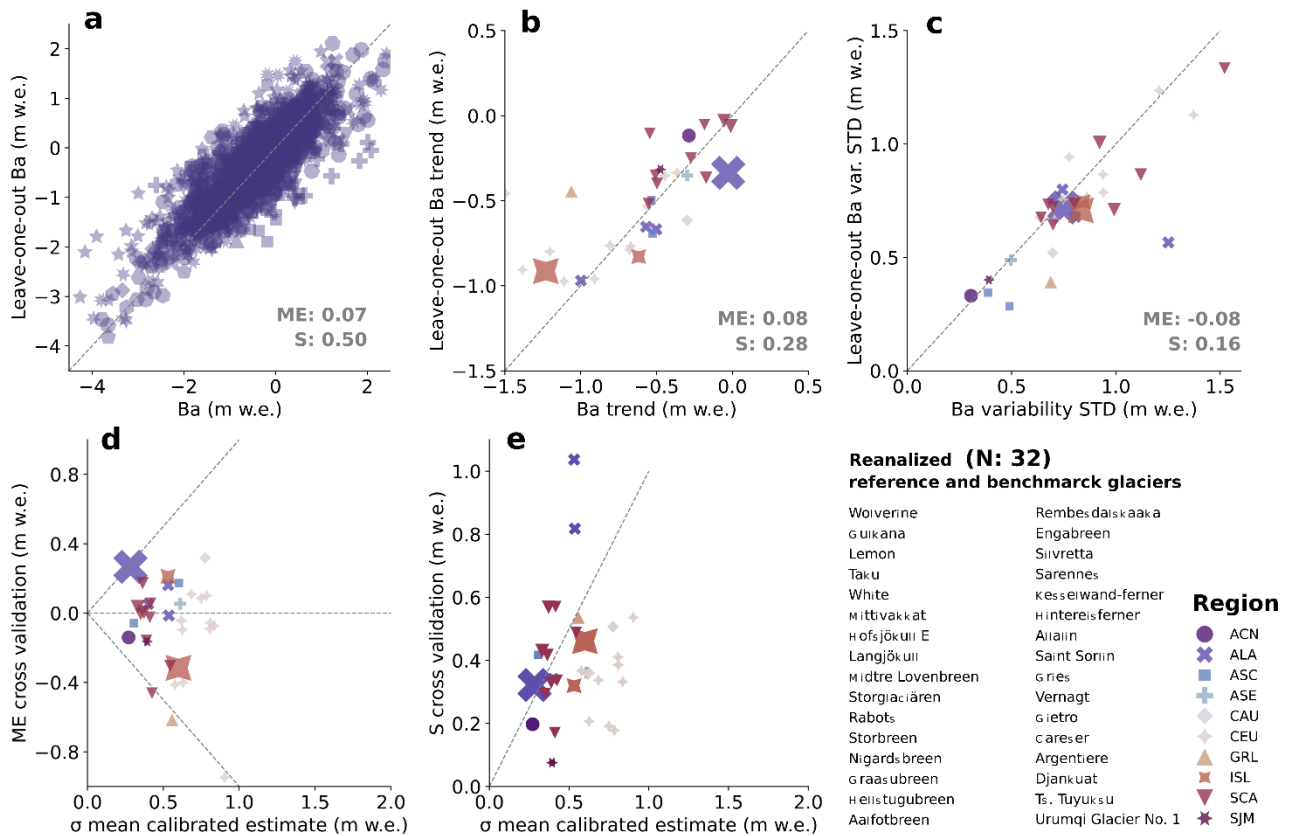

**Figure 6: Leave-one-out cross-validation results and statistics over 32 reanalyzed glaciological time series from reference and benchmark glaciers.** Mean error (ME) and standard deviation of the residuals (S) between the calculated leave-one-out cross validation time series and the 32 reference and benchmark glacier time series. **(a)** Yearly results from the leave-one-out calculated annual mass changes against the reference and benchmark glaciers annual mass changes. **(b)** Long term trends (period 1976-2023) from the calculated leave-one-out time series against long term trends for reference and benchmark glaciers. **(c)** Amplitude of the annual variability measured as the time series variability STD (not to be confused with the standard deviation of the residuals noted S) for the period 1976-2023 from the calculated leave-one-out time series against the reference and benchmark glaciers time series. **(d)** ME and **(e)** S of residuals for each reference and benchmark glacier against the estimated uncertainty of the mean calibrated estimate for the same glacier at  $\sigma$ . In a, b, c and d, each value corresponds to one of the 32 reference and benchmark glaciers used for cross-validation, symbols correspond to the glacier regions to which they belong. The size of the symbol is related to the area of the glacier.

Regarding validation, if direct glaciological mass-balance observations were not included in the calibration due to the lack of data over the baseline period 2010-2019, it would be beneficial to use these observations for additional validation if possible.

We disagree with the referee's comment for the same reasons stated above. These time series do not correspond to reference or benchmark glaciers and therefore might be biased due to the lack of reanalysis. To reduce the risk of validation against biased measurements, we intentionally exclude these glaciers and all non-reanalyzed time series from our cross-validation experiment.

Finally, the claim that cross-validation shows the uncertainty estimates are on the "conservative" side and that the dataset has realistic uncertainties needs clarification. The assessment of whether the cross-validation errors are sufficiently small is based on comparing them to the assumed uncertainties of the dataset. However, this approach may allow for "inflating" the uncertainties until they encompass the cross-validation errors.

The reviewer's comment is somewhat unclear, and we interpret that their statement "this approach may allow for inflating the uncertainties" refers to the practice of iterating (i.e. making changes) on the

uncertainty calculation until they agree with the cross-validation results. If this is what is meant, we disagree with the reviewer that this is a potential issue. Iterating to improve theoretical uncertainty quantification until it matches empirical uncertainty estimates from the cross-validation is a good scientific practice, and the very purpose of cross-validation. It helps identify potential gross errors (mistakes in implementation) and ensures a realistic estimation of uncertainties. This is true as-long-as the cross-validation is representative of the conditions in which the methodology is applied for the whole dataset. In this case, as pointed out by the reviewer, we did not sufficiently discriminate estimates spatially during the leave-out process. The addition of the new leave-block-out cross-validation proposed by the reviewer should further improve this.

We note however that the cross-validation cannot identify some sources of systematic errors already present in the estimates used (as they are validated against themselves), only the ones that might be introduced by our methodology.

In relation to Fig. 6d, there is confusion about the comparison presented. If the y-axis represents  $\sigma_{var_{\beta}}$  from line 193 (i.e., two times the standard error) and the x-axis shows the mean absolute error, there seems to be a comparison of two different types of errors. The metrics being compared are different in nature: the mean absolute error is calculated differently from the standard error. It is unclear whether these two metrics can be directly compared. Should the x-axis not display the RMSE (Root Mean Squared Error, i.e., typically larger than the MAE), as it involves estimating squared differences, which aligns more closely with the standard deviation? The standard deviation is typically used to measure the spread of errors around the mean, and RMSE would be more appropriate for comparing with it. Comparing RMSE on the x-axis with the standard deviation from the calibration on the y-axis would allow for a more consistent evaluation of prediction error (RMSE) relative to the inherent variability or spread of errors (standard deviation). Please verify this approach (if possible with a statistician) and provide a clear explanation for the chosen comparison, including its validity.

The confusion of the reviewer here is completely understandable. Thanks to this comment we were able to detect that there was also confusion among coauthors in terms of the best metrics to analyze the cross-validation results. We have now agreed upon using only the mean of residuals and the standard deviation of residuals as metrics to quantify potential systematic errors and random errors within the cross-validation results, respectively. We do not use the mean absolute error or the RMSE anymore, since they don't provide any additional information. We clarified the meaning of this parameter in the revised manuscript text discussion and corrected the panels from Fig. 7, Fig. 8.1, Fig. 8.2, Fig.9 accordingly.

#### **1.4 Limited "glacier anomalies" for specific periods or regions**

The manuscript mentions a threshold of at least three glaciers with mass balance anomalies as necessary. However, it appears that in regions such as the Southern Andes or Subantarctic and Antarctic Islands, only Echaurren Norte is used as a source of MB anomalies before the year 2000, and after 2000, only two to three glaciers are included. Are these sources truly representative for all the RGI regions in these areas?

The Southern Andes is a special case because there is only one long-term and continued glaciological time series available for the Central Andes: Echaurren Norte (1976-2023, the only reference glacier in the entire Southern Hemisphere) and only one sufficiently long glaciological time series for the Patagonia region: Martial Este (2001-2023). Both these regions are extremely different in climatology, and we decided to process them differently, considering the 2<sup>nd</sup> Order RGI regions for the Southern Andes, dividing Patagonia from the Central Andes at 46S. We intentionally tuned the Echaurren Norte anomaly as the glacier mean annual mb-anomaly for the Central Andes, the Martial Este anomaly for the Patagonia Andes. The mean annual mb-anomaly uncertainty for both regions is calculated by kriging accounting for the distance.

Past assessments of glacier annual mass change (Zemp et al. 2019) used the full annual signal from Echaurren Norte "as is" to estimate glacier mass changes in the entire Andes, as well as all time-series in the Southern Hemisphere: New Zealand, Low Latitudes, Antarctic and subantarctic. In our study, we decided to include



the Echaurren's full time series only for the Central Andes, where it belongs and where it is more likely to be representative of the climatology. For Patagonia, New Zealand, Low Latitudes, Antarctic and subantarctic we only include the Echaurren time series to "fill up" past period years (e.g. from 1976-2000 for ANT, 1976-2001 for NZL and SAN (Patagonia) and 1976-1992 for TRP, before the glaciological observational period of each independent regional sample). To reduce the effect of possible climatic differences between each neighboring regions, the amplitude of the Echaurren glacier anomaly over these "fill up" past period years is normalized to the amplitude of the mean glacier anomalies of the regional sample. The reduced robustness of the mean calibrated time series during these past filled-up years is apparent on the larger uncertainties in the time series. We make sure to clearly show these "fill up" past period years in the revised manuscript main Fig. 4 with grey lines and shading. Further, we added to the metadata files in every region both the number of anomalies used in each case, their ids and the "filled up" period they cover.

We acknowledge that considerable uncertainty remains in these undersampled regions, but we are confident that our present approach is better constrained than past studies, and it is the only possible way to go back in time with annual temporal variability for these regions, considering the lack of past period observations in the Southern Hemisphere.

Similarly, in the Alps, the MB time series are extracted only from Claridenfirn and Silvretta. To my knowledge, these observations are based on very few stakes during the first 40 years (only two stakes?), which likely introduces higher uncertainty compared to more recent MB time series (e.g., Huss et al., 2021, <https://doi.org/10.3929/ethz-b-000474039>; Huss et al., 2017, <https://doi.org/10.3189/2015JoG15J015>). Was this increased uncertainty in the past data accounted for in your analysis? The dataset and the estimated individual glacier MB time series show relatively small uncertainties for Central Europe in the period when anomalies are sourced from only two glaciers. Please clarify how these factors were addressed.

The increased uncertainty in the past is well accounted for in our analysis. This effect is apparent and well represented in our resulting uncertainties for, e.g. Central Europe, where uncertainties are two times larger before 1952 compared to the better constrained period after 2000. This is also apparent in other regions during periods where only few, or neighboring region glacier time series are used. In general, our results achieve a consistently good representation of the uncertainties across all regions, with larger uncertainties in regions and periods with small glaciological samples or where neighboring glacier time series are used for filling up past years. And vice versa, lower uncertainties in regions and periods with large glaciological samples.

### **1.5 Uncertainty analysis - signal to noise ratio**

The manuscript would benefit from a more comprehensive uncertainty analysis that examines how uncertainties vary between regions, glaciers, and time periods. This analysis should include a review of the number of glacier mass balance anomalies used, the covered years, their distances, and the amount of geodetic samples. Such information is crucial for potential data users to assess whether the data are suitable for their purposes.

In addition to this analysis, it would be valuable to include a metadata file for each glacier or grid point. This file should detail these statistics and clarify whether a glacier is "unobserved" and if the regional mean was used instead. Ideally, the metadata file would also list the glacier names used to extrapolate the MB anomaly for any given glacier.

While reviewing the paper and examining the data, several questions arise: Where is the annual time series valuable and useful, and where should caution. A quantitative analysis with statistical tests would be useful for addressing these questions (more discussion on usage cases stated by the authors is in Sect. 1.6).

One potential approach could be a "signal-to-noise" ratio test, where the standard deviation of the mean interannual MB time series is divided by the mean uncertainties (also represented as a standard deviation). If this ratio exceeds one, it suggests that the data adds value; if below one, it implies that uncertainties might overshadow the signal. While this simple ratio is not a rigorous statistical test, it can provide initial

insights into data usability. For most glaciers outside Central Europe, the estimated uncertainties are so large that the interannual variability appears smaller than the uncertainty, indicating a signal-to-noise ratio below one (review Fig. 1 left), which raises concerns about data reliability. A more refined approach could involve detrending the time series and comparing the standard deviation of the residuals to the uncertainties (review Fig. 1 right). Repeating the analysis for different time periods could further clarify the data's reliability. Please check with a statistician if this test or another test is suitable. This type of analysis should be included in the manuscript and referenced in the abstract and data documentation.

Figure 1: **Signal-to-Noise ratio analysis for the 20 regions of Dussailant et al. (in review):** (left) Boxplots

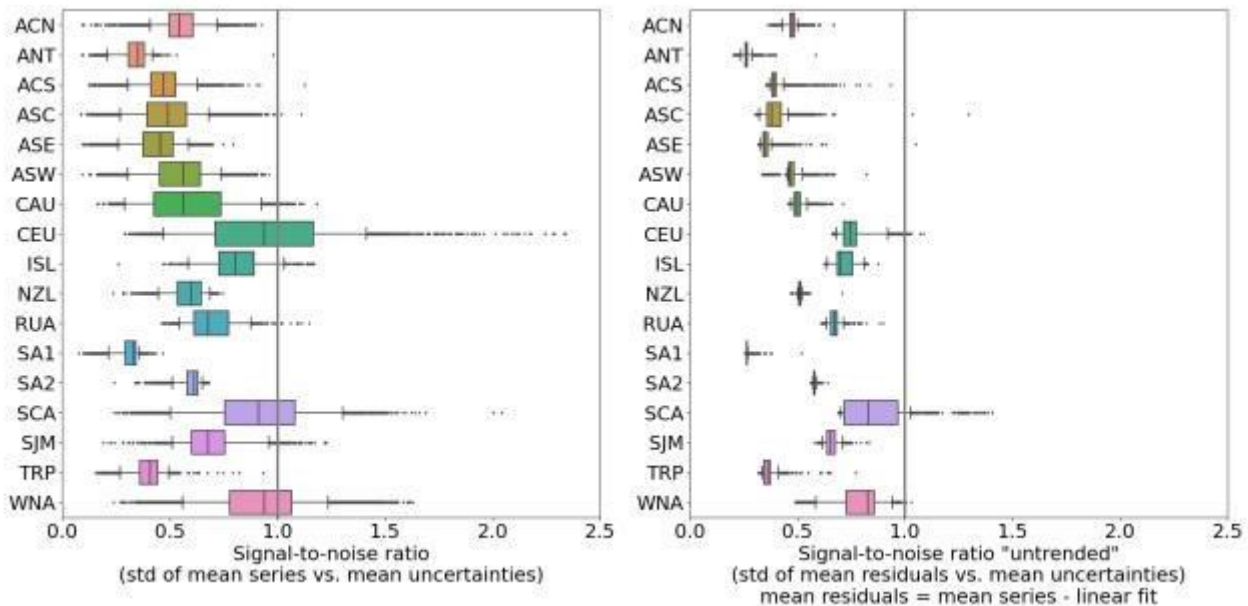

illustrating the signal-to-noise ratio, calculated as the ratio of the standard deviation of the mean interannual time series to the mean of the estimated total uncertainties for each glacier individually. A ratio below one indicates that the signal (interannual variability) is smaller than the noise (uncertainties). (right) Untrended signal-to-noise ratio, where a linear trend was removed from the time series to isolate the residuals. The ratio compares the standard deviation of these residuals (signal) to the total uncertainties. Values below one suggest that the residual variability is less than the uncertainties. (right) Untrended signal-to-noise ratio where a linear fit was applied to compute a trend, and then the signal was defined as the "residual" only. In both plots, values below one potentially mean that the signal is smaller than the noise (here assumed to be the uncertainties). The signal-to-noise ratios were estimated from the entire provided time series of each region. The total uncertainties were estimated by assuming complete independence of the three given uncertainty sources.

Performing a signal-to-noise analysis is a good suggestion, it is one way to give a measure of trust in the use of the data. However, a signal to noise analysis can be done in many ways depending on the use that the dataset will be given, it can be performed over various spatial or temporal scales: a specific glacier, a specific region, only during specific years, full time period etc. Further, what is considered as signal and what is considered as noise must be arbitrarily determined depending on the analysis (e.g., 1-sigma or 2-sigma uncertainties?). One might want to observe the signal over a given year related to the entire period, or a specific period and compare it to the mean uncertainty over that specific period or the entire series, etc. Further, there is also the problem that depending on the analysis performed, if something is not statistically significant it doesn't necessarily mean that is not true. Possibilities are endless and will ultimately depend on the specific use of the data. We prefer to put our effort into giving all the necessary information that individual users might eventually require to perform this analysis according to their specific needs.

In addition to this analysis, it would be valuable to include a metadata file for each glacier or grid point. This file should detail these statistics and clarify whether a glacier is "unobserved" and if the regional mean was used instead. Ideally, the metadata file would also list the glacier names used to extrapolate the MB anomaly for any given glacier.

We fully agree that a clear metadata file is a valuable addition to the dataset and will benefit potential data users to assess whether the data is suitable for their purposes.

We provide now for every region and on a glacier-by-glacier basis (i.e. for every single glacier in the RGI inventory), a .csv file with the additional metadata information as individual columns described in the following table and a metadata\_README file:

| Col_id | column_name                      | description                                                                                                                                                                                              |
|--------|----------------------------------|----------------------------------------------------------------------------------------------------------------------------------------------------------------------------------------------------------|
| 0      | <b>RGIId</b>                     | Glacier identifier from RGI60 - every file includes all RGI glaciers in the region (GLIMS_ID identifier for Caucasus region 12)                                                                          |
| 1      | <b>REGION</b>                    | RGI 1st order region code where the glacier belongs                                                                                                                                                      |
| 2      | <b>CenLon</b>                    | Glacier centroid Longitude (WGS 84 – EPSG:4326) extracted from the RGI60 glacier outline geometry (GLIMS outlines for Caucasus region 12)                                                                |
| 3      | <b>CenLat</b>                    | Glacier centroid Latitude (WGS 84 – EPSG:4326) extracted from the RGI60 glacier outline geometry (GLIMS outlines for Caucasus region 12)                                                                 |
| 4      | <b>Area</b>                      | RGI60 glacier geometry area in km2 (GLIMS area for Caucasus region 12)                                                                                                                                   |
| 5      | <b>WGMS_ID</b>                   | WGMS-FOG identifier for the given RGI glacier - glaciers with no WGMS_ID = no_WGMS_ID                                                                                                                    |
| 6      | <b>N_gla_anom_used</b>           | The number of glacier mb anomalies used to calculate the mean annual glacier mb anomaly                                                                                                                  |
| 7      | <b>ID_gla_anom_used</b>          | List of IDs of the spatially selected glaciers mb anomalies used to calculate the mean annual glacier mb anomaly (in WGMS_ID)                                                                            |
| 8      | <b>min_dist_gla_anom</b>         | Minimum distance of the spatially selected glaciers mb anomalies sample (i.e. distance to the closest glacier mb anomaly used to calculate the mean annual glacier mb anomaly)                           |
| 9      | <b>max_dist_gla_anom</b>         | Maximum distance of the spatially selected glaciers mb anomalies sample (i.e. distance to the farthest glacier mb anomaly used to calculate the mean annual glacier mb anomaly)                          |
| 10     | <b>mean_dist_gla_anom</b>        | Mean distance of the spatially selected glaciers mb anomalies sample (i.e. the mean of the distance of all glacier MB anomaly used to calculate the mean annual glacier MB anomaly)                      |
| 11     | <b>std_dist_gla_anom</b>         | Standard deviation of the distances of the spatially selected glaciers MB anomalies sample (i.e. the std of the distance of all glacier MB anomaly used to calculate the mean annual glacier MB anomaly) |
| 12     | <b>period_reg_obs</b>            | Period of the glacier time series where the sampled regional glacier anomalies are used to capture annual variability                                                                                    |
| 13     | <b>N_gla_anom_neighbour_reg</b>  | Number of additional neighboring region glacier anomalies used to fill the annual variability over past years in time series                                                                             |
| 14     | <b>ID_gla_anom_neighbour_reg</b> | List of IDs of the additional neighboring glacier anomalies used to fill the annual variability over past in time series (in WGMS_ID)                                                                    |
| 15     | <b>period_neighbour_reg_obs</b>  | Period of the glacier time series where neighboring region glacier anomalies are used to capture the annual variability                                                                                  |

|    |                |                                                                                              |
|----|----------------|----------------------------------------------------------------------------------------------|
|    |                | (i.e. period of filled-up past years)                                                        |
| 16 | N_geo_obs      | Number of elevation change (geodetic) observations available for the glacier for calibration |
| 17 | period_geo_obs | Periods where elevation change (geodetic) observations are available for the glacier         |

\*Columns 6 to 17, unobserved glaciers = no\_obs

\*Columns 13-15, glaciers where no additional neighboring region glacier time series are used = N/A

We revised Table 4, adding the following details to the data filename sections for **Dataset 1: Individual glacier annual mass change time series**.

**Metadata file name:**

RRR\_rgi-region-longname\_metadata.csv  
 README\_metadata.txt

One file per RGI 1<sup>st</sup> order region, where RRR corresponds to the RGI region code, and rgi-region-longname to the RGI region long name.

We note that we have not yet added the metadata to the netcdf files of **Dataset 2: Global gridded annual glacier mass changes**. This can be done later under request of the editor.

**1.6 Usage of the dataset as described by the authors**

Among others, the following usages of the dataset are mentioned by the authors:

- L20: "new baseline for future glacier change modelling assessments and their impact on the world's energy, water, and sea-level budget."
- L376: "This versatility enables identification of individual years marked by significant glacier changes and the detection of zones with varying impacts. For instance, it allows to pinpoint glaciers within a region that were affected by specific annual climate variations (e.g. droughts, floods, heat waves, etc.), as well as those with a larger or smaller influence on the yearly contribution to hydrology and annual sea level rise."
- L391: "spatial and temporal impact of known glaciological trends and anomalies like, for example, the Andes Megadrought (Gillett et al., 2006; Garreaud et al., 2017, 2020; Dussailant et al., 2019) or the Karakoram anomaly (Farinotti et al., 2020; Gao et al., 2020; Ougahi et al., 2022) at an unprecedented yearly temporal resolution."
- L644: "... vast potential for applications in various fields within and beyond 645 glaciology. These include international cryosphere observation intercomparison exercises; multi-Essential Climate Variable (ECV) products; serving as invaluable resources for calibrating and validating climate models; and advancing our understanding of the broader implications of glacier melt on sea levels, freshwater resources, global energy budgets, and nutrient cycling. This work opens new opportunities for future assessments of global glacier mass changes at increased temporal resolutions, fostering a more detailed examination of their climate and hydrological impacts worldwide."

The manuscript suggests that the dataset can be used for a variety of applications; however, there are concerns about the practicality and reliability of these uses, especially considering the uncertainties involved. Also, some of the examples provided are not sufficiently concrete, and it is unclear how uncertainties are integrated into these applications.

Fig. 5 presents an example from Iceland, but uncertainties are not shown. It raises questions about the reliability of pinpointing individual years when uncertainties are accounted for. Iceland benefits from

relatively good coverage of mass balance time series and has unique conditions due to the presence of volcanic eruptions, and is thus not very representative of other regions.

For regions such as the Southern Andes, Subantarctic, and Antarctic Islands, where annual data before 2000 are derived from a single glacier, the added value of the dataset compared to using data from that single glacier (or the few glaciers available) needs clarification. The dataset's ability to represent these regions accurately, considering the associated uncertainties, requires a more detailed discussion.

In lines **357-366**, the manuscript discusses mass changes for regions like the Subantarctic Islands and Periphery. Since these estimates are based on extrapolated data from Echaurren Norte and a few other glaciers post-2000, the confidence in these annual estimates may be limited. A more thorough discussion on how uncertainties impact the interpretation of mass changes should be included if these estimates are to be retained in the manuscript.

In the abstract, line 20 states: "...new baseline for future glacier change modelling assessments". Do the authors believe that glacier models should now calibrate their models to match the per-glacier annual anomalies? In my opinion, glacier models should not, because the uncertainties are way too large. Most calibration procedures just completely neglect uncertainties, and in that case, just calibrating to highly uncertain per-glacier annual MB time series would give a false estimate of confidence. While glacier modelers may benefit from having a more detailed MB time series to better constrain model parameters (such as the precipitation factor), the current dataset may not yet provide the level of precision required for direct application in glacier modeling due to its significant uncertainties. Some modeling approaches do incorporate uncertainties, such as the Bayesian calibration framework utilized by Rounce et al. (2023), which includes uncertainties from the 2000-2019 geodetic observations of Hugonnet et al. (2021). Once the uncertainty estimation approach is clarified and cross-validation is repeated with a data-denial approach, the MB time series and associated uncertainties may become valuable for such calibration methods. However, it is noteworthy that Rounce et al. (2023) did not incorporate the 5-year averaged per-glacier mass change observations from Hugonnet et al. (2021) due to the excessive uncertainties associated with these observations. A similar issue may arise with the current dataset.

Regarding practicality and reliability of our dataset, especially considering the uncertainties, we agree that the submitted manuscript and dataset was not clear enough to allow users to address this concern. However, we think that the new changes suggested by reviewer #1, addressed in the previous answers and considered on the revised version of the datasets and manuscript, now provide users with full transparency, allowing to define the practicality and reliability of their individual data usages.

To address the more specific comments:

**Fig 5 in the previously submitted manuscript (now Fig 6):** The aim of this figure is to provide a visualization of the spatio-temporal resolution of the dataset (i.e. available for individual glaciers, gridded tiles, regions). Iceland was selected as an example purely for aesthetic reasons: it's the smallest region and easy to visualize fully in one figure. There is no intention of showing or analyzing the specific results or the uncertainties of this region here. These aspects are clearly shown on Fig. 4, discussed thoroughly in the text and perfectly analyzable from the individual glacier time series and gridded product.

**Regions like the Southern Andes and Antarctic and subantarctic islands:** The issues regarding these regions have been discussed above. They are properly addressed now in the revised manuscript and figures and in the metadata of the dataset so that users are aware of the periods where the time series are less robust.

**Baseline for future modeling:** We agree that the usefulness for modeling was overstated, as a large part of our estimates are extrapolated, rather than interpolated, due to the limited amount of glaciological time series available. We removed these statements from the revised manuscript.

We agree that describing the dataset as a 'new baseline' is beyond our judgment. Data users are in a better position to make such a statement after testing the dataset. We removed these statements everywhere in

the revised manuscript.

## 1.7 Data and code documentation and availability

Firstly, it is great that the code and data are made fully available.

I have a few comments first on the provided data:

- Hosting the extrapolated / modeled per-glacier annual data on the WGMS website could potentially lead to misunderstandings. Given that this dataset is not purely observation-based, its direct availability at the WGMS website could result in misleading conclusions. If the decision is made to include the data directly on the WGMS website, it is essential to include a comprehensive "meta"-dataset and a flagging system to highlight glaciers/areas where the uncertainties are too large to extract a signal (as discussed in Section 1.5).

As mentioned above in the answer to comment 1.5, we now provide for every region and on a glacier-by-glacier basis, a .csv file with additional information that might be useful for users.

- The type of uncertainty documented in the dataset requires clarification. The term "uncertainty" is used generically, but it is unclear whether this refers to two times the standard error as described in Line 187, or one or two times the standard deviation (related to Sect. 1.1).

All equations represent uncertainties at  $1\sigma$ . Reported uncertainties in the text correspond to  $2\sigma = 95\%$  confidence. Therefore, the term "uncertainty" corresponds to  $1\sigma$  when describing equations and  $2\sigma$  for reported values.

- Currently, only individual uncertainties are provided, requiring data users to perform their own aggregation. It is strongly recommended to include a dataset with total uncertainties, as this will likely be the most utilized. Additionally, understanding the different sources of uncertainty and their origins took considerable effort. Enhanced documentation explaining these aspects would be beneficial for users.

We added to the dataset a 4<sup>th</sup> file for total uncertainties for each glacier combining the individual errors from elevation change, annual anomaly and density conversion factor, as in EQ12:

$$\sigma^2_{\bar{B}_{cal,g,Y}} = \sigma^2_{dh,\bar{B}_{cal,g,Y}} + \sigma^2_{f\rho,\bar{B}_{cal,g,Y}} + \sigma^2_{\beta,\bar{B}_{cal,g,Y}} \quad (12)$$

We revised Table 4, adding the following details to the data filename sections for **Dataset 1: Individual glacier annual mass change time series**.

### Total uncertainty file name:

RRR\_gla\_mean-cal-mass-change\_uncertainty\_total.csv

One file per RGI 1<sup>st</sup> order region, where RRR corresponds to the RGI-region code

- To enforce people, to look into the uncertainties, consider creating a netcdf file that has the mean time series, the total uncertainties, and a "flagging" system

The gridded netcdf files already contain the mean time series and the total uncertainties per grid point and per year. We could also apply a metadata index as an attribute field to allow users to "flag out" fields depending on index value over specific periods. This would make the dataset more user friendly, allowing users to easily flag out the gridded dataset to consider only the values that support their specific requirements. Still, we think it is more important to have this metadata information for individual glaciers, and then users can decide how to integrate them according to their own requirements. We will generate this additional metadata attribute per grid point if requested by the editor.



- **Issues found in the per-glacier annual time series**

- no glacier ID for Greenland, everywhere NaN values as IDs. Please update the glacier IDs for Greenland!

True and well spotted. This bug in the code has been corrected now. Thank you.

- a bit confusing to have sometimes GLIMS\_ids and sometimes RGI\_ids

The Hugonnet et al. 2021 dataset used the Tielidze and Wheate (2018) inventory available from GLIMS to calculate elevation changes in region RGI-12 Caucasus and Middle East. This decision was made because the glacier outlines from the RGI06 inventory are to a great extent erroneous in this region. The Hugonnet et al. 2021 observations were ingested to the FoG database related to the GLIMS-Id, to make sure that the calculations correspond to the GLIMS glacier extents. For consistency, in order to use the elevation changes from Hugonnet et al. 2021 for the Caucasus glaciers for this assessment's calibration step, we had to consider the Tielidze and Wheate (2018) inventory as well. We think this decision makes sense and is now more clearly explained in the revised manuscript.

Comments on the github/code:

We note to reviewer #1 that the updated code (after the changes done in this first round of review) is available from the new public repository: [https://github.com/idussa/global\\_mb\\_fusion](https://github.com/idussa/global_mb_fusion)

- It would be beneficial to include a README document in the GitHub repository that provides a brief overview of the functionality of each script. Such a document would guide interested users on where to find specific processes or analyses within the codebase. While the code does not need to be meticulously documented, a general overview in the README would greatly enhance the accessibility and usability of the repository.

We will add a summary README document in the GitHub repository providing a brief overview of the functionality of each script. This will be done at the end of the review process when the final code has been updated.

### 1.8 Terminology

- The terms "(mean) glacier (annual) anomaly" appear to be unclear and could benefit from clarification. It is recommended to use more specific terminology, such as "(mean) glacier (annual) MB anomaly" or "glaciers with glaciological MB time series". This issue is particularly evident in Figure 1, where the term is not yet explained. The phrase "glacier anomaly" may imply that the glacier itself is unusual or deviates from expected behavior, rather than referring to mass-balance measurements. Including the term "mass-balance" would help clarify the meaning and ensure consistency throughout the manuscript (e.g., line 169 and other mentions).

Agreed we replaced "(mean) glacier (annual) anomaly" with "(mean) glacier annual mass-balance anomaly" everywhere in the revised manuscript text.

- What is the difference between GTN-G regions and RGI6? For instance, in Line 102, GTN-G regions are mentioned, yet later references seem to align more closely with the "usual" RGI6 regions, with the exception of the Southern Andes, which is split differently. It would be beneficial to review the references to GTN-G and RGI6 throughout the manuscript to ensure consistency. If possible, it is recommended to use only one of these terms to avoid confusion.

Agreed we now refer only to RGI regions in the revised manuscript text.

## Specific comments

To maintain relative conciseness in the review, specific comments have been provided without consistently using phrases such as "please reconsider" or "please change." However, many of these specific comments are intended as suggestions to guide improvements and offer constructive feedback, rather than as strict directives. Some comments made in the general comments section may be repeated in the specific comments section, potentially with additional elaboration or different descriptions. In the response to this review, you may disregard specific comments that you have already addressed in the general comments.

### 2.1 Title, Abstract & Introduction

- **L1** The title overstates the precision of the data and does not acknowledge the uncertainties sufficiently. Maybe change to something like "Uncertainties in extrapolating annual glacier mass changes from 1976 to 2023: Estimates for every glacier world-wide based on in-situ and geodetic data". At least the methods of your approach should somehow be incorporated in the title. For example, the phrase "from in-situ extrapolation" could be added to the title.

#### Regarding the Title:

We propose two new titles as a better fit regarding referee #1 (one more technical and the other probably for non glaciologist). The take of the editor and reviewers on these title is welcome.

1. Annual mass change of the world's glaciers from 1976 to 2023 by temporal downscaling of geodetic estimates with glaciological observations

Annual mass change for the world's glaciers from 1976 to 2023 by temporal downscaling of satellite data with in-situ observations

#### Regarding the Abstract and Introduction:

The Abstract and Introduction have been fully rewritten accounting for reviewer #1 and #2 comments. Some comments remain unanswered because they are no longer relevant for the revised manuscript (e.g. typos of non-existent text, comments on inexistent figures, etc). We state in every case if this is no longer relevant.

- **L19-20** In my opinion, you can not yet conclude that from the current leave-one-out cross validation (see Sect. 1.3). Also change: "in the conservative side" to "on the conservative side

No longer relevant in the revised manuscript

- **L32-34** From these 500 glaciers, much less are actually usable time series. I think it would be valuable to rather mention how many you use (the glaciers with "glacier anomalies"). You also say, that nearly all glacier regions are represented. However, from these 500 glaciers, a lot are in Central Europe... related to Sect. 1 and idea of giving a clear overview of amount of used glacier MB anomalies and covered years-

We state in the introduction the number of glaciers with glaciological observations available in the WGMS-FoG database, which is about 500 glaciers. Their number, coverage, and hypsometry are well represented later in Fig.1. As for the number of annual mass-balance anomalies available in every region, the information is available in Fig. 1. Information on the annual mass-balance anomalies used by every glacier to calculate the mean annual mass-balance anomaly is available in the metadata.

- **L54** define FoG here (it is defined only later)
- **L54-58** long sentence, I don't understand the meaning of the sentence, specifically of "and evident..."
- **L67** "global glacier ice changes": mass or volume?

- **L68-71** Why are the geodetic observations of Hugonnet et al. 2021 giving you information on annual mass changes. For example from where do you get the density conversion information here? Rephrase the paragraph to clarify that you use the glaciological mass-balance observations.
- **L74** define "Fluctuations of Glaciers" at the first usage (L54)
- **L77-87** I am not sure if this paragraph is really necessary. You write here what you did, but not really the results. E.g. L78-80: strange to mention that here, as it does not tell the reader in which regions it works and in which it does not work so well...  
L85-87: the two sentences seem to be very similar, maybe combine in one sentence

The last 6 points are no longer relevant in the revised manuscript

## 2.2 Data and Methods

- **L93** do you apply any correction as the RGI dates are often different to year 2000?

Yes, when transforming from m w.e. to Gt (individual glaciers, regional or global estimates), we use glacier areas that have been corrected to the year 2000 using area change rates from literature and updated from Zemp et al. (2019). This is stated in Method section L297 and further discussed in section 5.5.5

- **L109** to which year do these outlines correspond?

They are also corrected to 2000

- **L104** this should be in the caption, but actually the grey bars are almost not visible  
We state this in the caption "Glacier hypsometry from RGI 6.0 (grey) is overlaid (and almost hidden) with glacier hypsometry of the geodetic elevation changes (Geo, blue)"

- **L108** FoG already defined in database

No longer relevant in the revised manuscript

- **L114-L115** "throughout their full hypsometry" : what is meant by that?

That means, throughout their entire elevation bands

- **L136** Are these short-term geodetic records also excluded in the statistics of Fig. 1. Please clarify! Similarly, in Fig. 2, you show the short-term geodetic records, I would recommend removing or labelling them as you don't use them for the calibration.

The reviewer must be confused here. Figure 1 is showing the number of glaciers with geodetic observations, and the surface covered by the glaciers with geodetic observations. It is not showing the number or period of the total geodetic observations. We removed the geodetic observations shorter than 5 years from Fig. 2.

- **L142-148** It is difficult to understand these steps if you haven't read the individual subsections. I would suggest to either put that at the end of Sect. 2.2.3, or instead move the important stuff into the captions, or somehow clarify that the individual steps will be explained later ...

The methods text refers to the figure at every step. The individual steps are explained briefly at L150-L155, and then later in more detail.

- **L150** Fig. 2 caption: (see Fig. 2 comments below)

The figure has been remade completely

- **L160** What is  $\sigma_{B_{glac}}$ ? I assume it corresponds to one standard deviation, but I think it is important to mention that. You often have the  $\sigma$  term in your equations, maybe clarify here directly if those represent always one standard deviation.

Everytime there is  $\sigma$  it means one standard deviation, otherwise it will say  $2\sigma$

- **L169** "glacier annual anomaly" → see Sect. 1.8

## Changed

- **L168-170** You choose a threshold for the amount of years within 2011-2020 for a glacier to be chosen to be used for your calibration approach. However, how many years outside of the 2011-2020 years are necessary that a glacier is chosen to be used? I think this is important to mention / analyse to understand the "number of glacier anomalies" of Fig. 1

If a glacier has glaciological measurements during at least 8 years and during the reference period, the anomaly is calculated and used.

- **L174** "more than two...": replace with "at least three glaciers with mass-balance anomalies". This threshold is only valid for the search radius, as there are many periods and regions where the anomalies come from less than three glaciers? (related to Sect. 1.4)

This comment is no longer relevant with the change to the kriging method

- **L180** the uncertainties of the anomaly are computed without any inverse weighting correctly? Maybe clarify that!

This comment is no longer relevant with the change to the kriging method

- **L182** Do you mean here  $\sigma_{glac}$ ? If yes, please clarify and maybe refer to eq. 1?

This comment is no longer relevant with the change to the kriging method

- **L183-186** These are almost the same sentences as in line 162-164! Remove one of them. Also typo: replace "ire" with "are"

This comment is no longer relevant with the change to the kriging method

- **L186-189** Why do you use two times the standard error here, why not the standard deviation. More about that in Sect. 1.1

This comment is no longer relevant with the change to the kriging method

- **L191** Why can you assume here random error propagation? Couldn't it be that on a specific year, glacier mass balance is under/over estimated for several glaciers because of a specific "climatic" phenomenon? (see also Sect. 1.2)

This comment is no longer relevant with the change to the kriging method

- **L194** "low confidence glaciological series" → how do you define "low confidence"? Are only high confidence glaciological series included in the statistics of "glacier anomalies" in Figure 1?

L173-174 comment changed to this line and is explained better. For example: Urumqi East and west branches (ASC) correspond to the separation of the Urumqi glacier into two different branches, we use only the full glacier time series because it is longer, and because it is likely more representative of the climatology of the region, since the branches are very small patches of ice.

**L196-197** What do you mean by that? I guess you mean by that that you want them to have anomalies until then? This sentence does not say something about how much glaciers with "glacier mass-balance anomalies" are used, but when I first read over the sentence I thought that you want to say that you somehow only select glacier mass-balance anomalies that cover the entire period 1976 to 2023. Please rephrase.

This has been rephrased

- **L197-200** How do you define "climatically similar" (see comment to Table 2)? Here you describe gaps in mean calibrated glacier MB annual-anomalies that result from the aspect that no glaciers with observations for these gap years were found within the search radius? But do you also explain how the uncertainties are estimated for these gaps?

"climatically similar" = L198 the best correlated glaciological series from neighboring regions

- **L212** add the unit of the density conversion factor (maybe best to make it in  $\text{kg m}^{-3}$  and then divide by 1000 in eq.5) it should also be  $0.85 \pm 0.06$  (not 0.60)

Done

- **L215** here the  $\sigma$  is in units of kg m<sup>-3</sup>, please be consistent. The acronym is also different to line 212.

Corrected

- **L213** eq.6 is a bit confusing, as it is unclear for what this is done. Maybe add that this uncertainty is later used for the weighting algorithm of the geodetic samples in eq. 8 (if I got it correctly).

Clarified in L236: This corresponds to the uncertainty on the geodetic mass balance rate in m w.e.

- **L218-222** I had to read this several times to hopefully understand it. You create for every geodetic sample of  $\geq 5$  years, an individual time series which goes over the entire considered period (not only the period of record of the geodetic sample), correct?

Correct

- **L222** here you write "only geodetic observations larger than 5 years" are used (also in L230), but in L155, you wrote longer or equal to 5 years. Which option did you choose?

Corrected in the text, only larger than 5 years are used.

- **L224-226** You explain the uncertainty estimate, but there is no equation to it. I have the feeling that exactly this is already done in eq. 9-12, maybe? If yes, please merge this sentence with the explanations there? Or is this where you basically convert  $\sigma_{b \bar{e} \bar{t} a g, y}$  to  $\sigma_{b \bar{e} \bar{t} a k, y}$ ?

This has been rephrased

- **L231-234** Maybe add the respective acronyms (such as  $W_t$  for the second uncertainty part) at the end of the descriptive sentences. Like that it is easier to understand eq. 8, and otherwise the acronyms of eq. 8 are not explained.

Done

- **L239** replace considering with "assuming", because you do not show that, or?

This has been rephrased

- **L241** I don't really understand why you call it "error" separation. You aggregated the errors beforehand for the weighting, but you have the errors already individually, so you don't need to separate them again, or? What eq. 9-11 do is basically averaging the uncertainties from the individual k mass change time series of the individual geodetic samples. If yes, maybe instead add something like that instead of saying error separation. You could also maybe explain everything from line from 239 to 244 before explaining the weighting, and then at the end explain how you get to the total uncertainties (L245). Then you don't need to say you look again at the errors separately...

This section has been rephrased

- **L245** Why can you assume independence and add up the square roots of the different squared standard deviation uncertainty sources to get to the total uncertainty? If I get it right these three uncertainties are the ones available in the per-glacier files. In the data files the total uncertainty is not available, maybe consider adding the total uncertainty as dataset, or somehow clarify that in the manuscript

Total uncertainties have been added

- **L240-246** What kind of errors do these uncertainties represent? Standard errors or standard deviation? I am just wondering because at least one of them apparently represents the standard error (i.e. the one calculated via line 192?)

This comment is no longer relevant due to the change to the kriging method

- **L248-249** I find this sentence a bit confusing. Maybe clarify that this is what you did, i.e. rephrase by saying.... We calibrated a mean annual mass change for ...
- **L249** Explain what you mean with unobserved. If I understood correctly, it is a glacier that is not

available in Hugonnet et al. 2021 (and also does not have any other geodetic observations or in-situ observations). Correctly

This has been clarified in the revised manuscript. Hugonnet did not have full coverage, only 97.4% of the global glacier surface. In the Fog, only estimates for 205.120 glaciers have Hugonnet observations, which is 95% of the global glacier by number. The full coverage of the FoG is 206554 glaciers with Geodetic observations, which is 96% of the global glaciers by number.

- **L250** replace "Individual" with "individual"

Done

- **L254** why is it only of the observed glaciers? Don't you use all glaciers where you created calibrated data and then in addition the "unobserved" glaciers?

It refers to all glaciers, unobserved glaciers are considered to behave as the regional mean, so then this regional mean is multiplied by the unobserved area.

- **L255-257** It is great that you account here for spatial correlations, and have identified that some error sources are significantly correlated spatially, such as elevation change, density conversion and annual anomaly prediction. Are there any figures/analysis for that? I am not an expert here, but I am wondering if you need to account for a similar spatial correlation when estimating the total uncertainty of an individual glacier mass balance time series? The reason is that the glacier anomalies are estimated from time series that are coming from different glaciers.

Spatial correlations are considered wherever it was possible. This is now much more clearly explained in the revised manuscript.

- **L263** Huss et al., in preparation: It would be good to add some details here. When looking into the density uncertainties of individual glaciers, they seem to be quite small.

This has been rephrased

- **L268** "errors to the real values": what do you mean by that

This has been rephrased

- **L269, eq.16** see Sect. 1.2

Answered in 1.2

- **L270** "as independent". Why can you assume that?

See response to comment 1.2: The reason behind this difference in focus is that the assumption of correlation between sources has negligible impact compared to the spatial correlation of errors within the same source. This is because we only have 3 main sources of uncertainties, while we have 200,000 glaciers distributed spatially.

- **L273** Fig. 2f does not exist

True, deleted

- **L276** Same as L268. Why can you assume that? you use different expression for the same aspect, i.e. assuming that the errors are independent, then write law of random error propagation... maybe stick with one thing

This has been rephrased

- **L279** Zemp et al. 2019: "et" is written in different text style

Checked

- **L281** regional mass loss uncertainties independent and uncorrelated : from where do you know that you can assume that...

Answered in 1.2

- **L285** do you assume that all mass loss is above sea level? eq. 21-23 are not explained

Yes we assume all loss above sea level. They are explained in L280.



- **L315** starts at the first year of mass change records, is a single mass change record sufficient to start from that year, or is it three glacier MB anomalies?

We do not fully understand what the reviewer means here

#### Table 1

- **L5** maybe add another row with the differences in the Uncertainty?  
Done, as in the GCOS 2020 requirements

#### Fig 1

- It is strange that you show the location of all glaciological samples, although in this study you only use a fraction of these (i.e., just those with glacier anomalies). I think it makes much more sense to visualise those glaciers with a MB time series. I would prefer to see the hypsometry of those glaciers with "glac anomalies" instead of those from all glaciers with measurements.
- For me, the focus of this figure at the moment is to show the hypsometry of the glaciers of that region. For me it would be more interesting to see the statistics of the glaciers that are used for the "glacier mass-balance anomalies" visually. For example, how many glacier MB anomalies are actually used for the individual years of the time series

Answering the two previous points, Figure 1 is meant to show the number, spatial coverage and hypsometric coverage of the input geodetic and glaciological observations existing in the FoG, our input dataset. The information on the number of glacier annual mass-balance anomalies calculated for every region considering our reference period (2011-2020) is stated in the figure. Further information on statistics requested by the reviewer is more relevant at glacier level and is available in the metadata. It is not possible to add all this information for each glacier in Fig. 1.

- maybe remove duplicate labels to make the figure less busy

We disagree, having the labels for every region is reader friendly.

- it is very difficult to see the hypsometry of the "glaciological" sample as the red is difficult to see  
This is exactly the point, to show that the coverage of glaciological observations is very little both in number, coverage and hypsometry. Whereas the coverage of geodetic observations is nearly complete, as it hides the grey (full) hypsometry of the RGI glaciers.

- you give the % of observed glaciers in terms of glaciological or geodetic observations. Is a single observation in one year that the glacier is here "observed"?

The figure is not showing the number of geodetic observations, but the number of glaciers having geodetic observations, and the area and hypsometry they cover. As a reminder, 205,120 glaciers (95% of the world's glaciers) are covered by the 20-year estimates from Hugonnet et al. (2021). The geodetic observations coming from other studies cover 14% of the world's glaciers. Considering all these observations together, there exist geodetic measurements longer than 5 years for the number of glaciers shown in Figure 1, the area and hypsometry they represent. Geodetic estimates shorter than 5 years are very rare, and usually exist only over well-sampled glaciers that are as well covered by longer periods. For glaciological, we consider glacier-wide time series.

The red shows the hypsometry of glaciers with any kind of glaciological observations (I count 468 glaciers there)? If I understand correctly the amount of glaciers with observed mass-balance time series are described by the "glac anomalies"? How many observations are necessary to be such a glacier? Maybe add that to the caption (it is later described in the text, but maybe good to explain it also here). Also related to that: change the wording of "glac anomalies" and describe that in the Fig. 1 caption, see Sect. 1.8).

- the grey "RGI6" glacier hypsometry is almost not visible (specifically if you print it)

The coverage of geodetic observations (blue) is nearly complete; therefore it hides the grey (full)

hypsometry of the RGI glaciers. This has been clarified adding a statement in the figure's caption.

- explain in caption the meaning of the circles (glacier region area). Location of the circles is sometimes far away from the region's glaciers. For example in CEU, SCA, NZL. In 17-SAN, there are two circles, probably from the two subregions, this needs to be documented further and if the two circles are kept the region should also be split up via the "black" lines.

The meaning of the circles has been added to the caption

## Table 2

- Why did you exclude these specific glaciers?

Explained previously in this document. For example: Urumqi East and west branches (ASC) correspond to the separation of the Urumqi glacier into two different branches, we use only the full glacier time series because it is longer, and because it is likely more representative of the climatology of the region, since the branches are very small patches of ice.

- How did you choose the complementary glacier mass-balance anomalies?

In non-observed regions like ACS and RUA, we selected the closest and more similar regions time series. For ASW and ASE because they are the longest available time series for HMA, as done in Zemp et al., 2019. For NZL, regional series only start by 2005, we add Martial Este because is well correlated and had similar amplitude, although because of the distance (>7000 km) it won't have much weight by kriging.

- How did you choose the complementary normalized glacier mass-balance anomalies?

By choosing the best correlated glaciological series from neighbouring regions over the common period of observations, i.e. the ones that better represented the climatology of the regional time series during the common period.

- typo: Hinteeisferner → Hintereisferner

Corrected

## Fig. 2

- It is a bit strange that you show the method for one of the best measured glaciers. Hintereisferner has an annual time series for over 60 years. I think it is very necessary to show at the same time the method for a less well sampled glacier, i.e. a glacier with no in-situ observations, with less and shorter available annual MB anomalies, and with only the Hugonnet et al. 2021 geodetic sample data. This second glacier corresponds better to most glaciers world-wide, I guess? You could add the other glacier in the same figure to have the comparison. Or move the Hintereisferner example in the supplements and add here another glacier.

Figure 2 has been completely remade accounting for the changes in the methodology to kriging. We also now added two more glaciers other than Hintereisferner, Gulkana in Alaska, a middle sampled region, and Mittivakat in Greenland Periphery, and undersampled region.

- You show here the data of Hintereisferner only from 1952 onwards (i.e., the start of the Hintereisferner observational period). In the dataset that you want to publish, however, the new calibrated time series begins already in 1915. I think you should either mention this in the caption or show it in the figures. From the perspective of Hintereisferner, the period from 1915 to 1952 is the most interesting, as this is the period where your method actually creates new data.

The figure is meant to show methodological steps, not the Hintereisferner time series. We clarify in the legend that the full times series starts in 1915 but for visualization purpose you decided to start in 1950.

- a: There is a big red cross in North Africa with the text *Bglac* search. I find that rather confusing.

Panel a has been removed

- b: you mention 10 glaciers with anomalies, I guess one of the 10 is HEF itself, correctly? So, what we see are 10 thin lines together with the inverse-distance weighted average and the uncertainties around it? And if I understand correctly, some anomalies are over the entire time period, and others are just over a period of time. It would be interesting to somehow visualise that. Probably this gets easier with a glacier with less glacier anomalies around. I think it would be good to color the line showing the in-situ observed glacier mass-balance anomaly of Hintereisferner, I guess it will be near to the mean annual anomaly? At least it should be clarified in the caption or subplot that one of the lines represents the anomaly of Hintereisferner. You do not explain what the grey shading is. You added the equation and from that I assume that the grey shading are the uncertainties from eq. 4, but I believe, both the grey shading and the equation need to be explained (e.g. by referring to eq. 4, and saying in caption that the shaded area corresponds to "two standard errors from the glacier MB anomalies and the glaciological sample uncertainties"?)

This comment is no longer relevant due to the change to the kriging method

- c: you write that you only use geodetic data with at least five years. However, in the plot, it seems like you also plotted the geodetic sample data for smaller periods? (even for single years, e.g. 2003). As you do not use them in the calibration, I would not include them in the plot, unless you somehow mark them in another color/style to clarify that these are just used for validation? Please also add how many grey lines there are, i.e. how many geodetic mass change observations were used. From Sect. 2.2.3, I understood that every of these "k" lines have their own uncertainty estimated from (b). Although too complex to visualise, you might mention that in the subplot or caption. I would also prefer to see the uncertainties of the geodetic estimates instead of having red/blue filled areas to the zero line.

We removed the geodetic observations shorter or equal to 5 years from the plots. Adding the uncertainties would make the plots too busy, for clarity of visualizations we prefer to keep the figure as simple as it can be.

- d: What are the red and blue lines? I guess this is the same ones as in c? Not sure if it is necessary to keep them, but in any case, you need to describe them in the caption or in a legend. You just write, that the grey is "uncertainty". Please clarify what kind of uncertainty it is (see comment in Sect. 1.1). I would like to see here how the mean calibration time series changes to the actual in-situ HEF observations with that approach. I guess it is quite near as it is included. I think you should add a colored line with the actual Hintereisferner observations (similar as suggested for subplot b).

Red and blue lines are described in the caption of the figure: "(b) Calibration of the mean annual mb-anomaly over geodetic mass balance observations available for each glacier (Red and blue lines). Grey lines correspond to the individual calibrated time series for each geodetic mass change observation."

- add the corresponding equation numbers to b, c, d; consider adding legends into the subplots to clarify better what the lines mean

The figure is already quite complicated and full. We prefer to keep the figure simple.

- Fig. 2b, d: "mean calibrated time series" and "mean annual anomaly" isn't it mean and "some kind of uncertainty" that you show?

In both cases we show both the means and their calculated uncertainties.

table 3:

- "low confidence" glaciological/geodetic estimates : how is this defined?

Answered and clarified in a previous comment

- empirical function "of"...Hugonnet et al. 2022; Huss and Hugonnet (in prep) → called differently somewhere else, be consistent!

We are now consistent in citing as Huss et al. (in prep)

table 4:

- "uncertainty" : what uncertainty does that describe? Standard error/standard deviation/two times standard deviation?

This issue has been answered elsewhere in this document

- Dataset 1: there is no dataset with the total error. Interested people need to aggregate the uncertainties themselves, which is error-prone.

Added

- Dataset 2: is the dataset really that large if you add all years together, it is easier to download just one file instead of many...

Both formats are possible.

- Dataset 2: here you have mean time series and total error : again, what does total error represent?

Total errors for an individual glacier: EQ 12

- see table XX: -> ref. is missing

corrected

- time series start "of" hydrological year (of was missing)

We mean the starting hydrological year

## 2.3 Results

- **L326** What do the numbers represent? One standard dev. / std. error?

This issue has been clarified elsewhere in the document

- **L333** Maybe refer here to Fig. 3; is it "m" or "m w.e", in Fig. 3 it is in m w.e.

We say it is thickness change not m w.e.

- **L356** attention: your estimates are not "observations" anymore, as you apply basically a model to get the individual glacier MB time series. Consider rephrasing the word "observed".

We disagree here, these are the statistically modeled observed values, we think the observational vs modelled issue has been sufficiently clarified throughout the revised manuscript, and we can use the word observed to refer to our results.

- **L357-366** It is unclear to which figures or tables you refer to in this paragraphs. You write volumes, but write "GT". I would suggest to replace volume everywhere by mass to coincide with the GT unit. Can you really say with confidence that these mass changes occurred on single years? More in Sect. 1.6

This has been rephrased

- **L359-362** I didn't understand the last part of the sentence, consider rephrasing the sentence.

This has been rephrased

Fig. 3:

- Global subplot: move that subplot up as the mass change time series axis is very near to the the Russian Arctic subplot. To make some space, move maybe the global pie to the center left part of the plot

Done

- It is a bit confusing that the global plot is in a different style than the regional subplots

Corrected

- Some of the timeseries are difficult to see due to the bright colors of that region. Consider using black instead and only color

We prefer color coding to separate regions

- Caption: the area of the pie charts: maybe clarify that you mean the size of the circle

Corrected

Fig. 4:

- Why does RGI19 and RGI05 regional glacier mass increases from 1979 to 2000? Are there any physical explanations for that or other studies showing the same? It seems like Zemp et al., 2019 had less positive MB on these two regions.

This is no longer an issue for RGI05 (corrected thanks to kriging), for RGI19 this is discussed in the text (L580-585)

- You describe here the meaning of m.w.e. but this concept is used earlier. Maybe rather describe it somewhere in the methods?

It is described before in Table 1

## 2.4 Discussion

Fig. 5

- More in Sect. 1.6

Most of the issues raised here have been answered elsewhere in this document, mostly section 1.6.

- year 1976: (i) and (ii) look very different. On the individual time series, it looks like all glaciers lost mass, while on the gridded dataset it seems rather that they gained mass. Why?

This was an error in the figure and has been corrected, thanks for spotting this.

- **L398-400** "...selected considering..": but that means you select glaciers where you know it works. Isn't that kind of a bias towards specific glaciers?

- **L403** How many of the 32 glaciers are in CEU? Does a typical "reference" glacier not have much more "glacier anomalies" in their search radius than a "normal glacier"? see Sect. 1.3

This issue is discussed in the text of the leave-block-out cross validation section 5.3 of the revised manuscript and in answers 1.6 to this document.

- **L431** "seven glaciers" : In Fig. 2b, you wrote that there are 10 glaciers used to estimate the "Mean annual anomaly" of HEF. If you remove the anomaly of HEF for the cross-validation, there should be still 9 available glaciers, why is it now seven? In Fig. 8a, there are also 9 glaciers listed.

This comment is no longer relevant due to the change to the kriging method

- **L435-436** To my knowledge, the RMSE (combines variance and systematic errors) and STD-diff

(variability in the errors) do not directly verify whether there is no systematic error for Ba. Without checking the bias, you cannot confidently rule out systematic errors. I think it would be important to include the bias in Fig. 6,7.

This is addressed in section 1.3 of this document. We now use only the mean of residuals and the standard deviation of residuals as metrics to quantify potential systematic errors and random errors within the cross-validation results, respectively. We do not use the mean absolute error or the RMSE anymore, since they don't provide any additional information.

- **L441-444** Maybe clarify by writing sth. like ... For XX out of XX glaciers, the actual standard deviation is >XX larger than the standard deviation estimated by the cross-validation. Do you believe that in general the interannual variability is underestimated by your approach? This is very important to clarify, as e.g. glacier models interannual variability largely depends on the precipitation factor.

This has been rephrased in the revised manuscript

- **L448-454** I don't fully agree that you can conclude all of that. I am specifically confused about the comparison of two times the standard error vs MAE. (discussed more in detail in comments about Fig. 6d in Sect. 1.3).

The MAE is no longer used as a metric, this has been rephrased in the revised manuscript

- **L454-456** This is a major problem, and should also be accounted for in your cross-validation and uncertainty analysis. This is one of the main reason why I can not accept the conclusions from this paragraph. See Sect. 1.3 for an idea of a data-denial analysis.

This issue has been addressed in 1.3 and the data denial analysis and the statement rephrased in the revised manuscript

- **L476** are these cumulative mean mass losses within the uncertainties of Zemp et al. 2019? Please add uncertainties to these numbers!

Yes, they are, uncertainties added.

- **L486** Deviations of more than XX : please clarify that you compare here to Hugonnet et al. 2021 2000-2019 period?  
Why do you have these differences in the regional trends w. Hugonnet et al. 2021 in the period 2000-2019? Do they only come from additional geodetic data used over that period and in these regions? Or do the glacier anomalies (in-situ observations) also influence the regional trend over the period 2000-2019?  
In the entire paragraph, the mentioned differences are within the large uncertainty ranges of the regions. If you mention the differences, I believe you should also mention that uncertainties are larger than the differences.

The discussion here has been rephrased. We discuss in this section where the differences between Zemp, Hugonnet and our study might be coming from.

- **L535-537** You apply a "model" by extrapolating the glacier anomalies from reference glaciers to another glacier. For example, you assume that the anomalies are similar for nearby glaciers, you even select a glacier with the most similar climate for glaciers in regions without glacier anomalies. All these choices are somehow like a model. Therefore, you should not call this product a purely observation-based product.

We agree. These statements have been rephrased throughout the revised manuscript.

- **L549** From where do you know if the estimated uncertainties are sufficient. The cross-validation that you applied can not tell you that as none of the glaciers of the cross-validation are e.g. in Southern Andes or Subantarctic and Antarctic Islands.

We agree. The discussion has been enriched with the leave -block-out cross validation and statements adjusted throughout the revised manuscript.



- **L550 onwards** You clearly state the problem, but I am wondering if it is then really valid to still give an annual time series for these regions and periods of extremely high uncertainties

We think is valid, as is the best we can do with the observations we have, we are careful explaining the limitations, and this stands as a clear statement showing where the efforts need to be put on in the future of the observational front.

- **Sect. 5.5.1** I think adding an overview of which geodetic data sources were included before year 2000, and which after year 2000 would help. Which kind of additional geodetic observations were used to compare to Hugonnet et al. (2021) in the period 2000-2019? Did you use any photogrammetric data for geodetic observations in the past? L560: I assume, this is future work, so maybe clarify that.

This has been included in the metadata file

- **Sect. 5.3.2** maybe also discuss potential usage of terminus location (e.g. more used in glacier runoff studies)

We removed all statements of potential uses of the dataset on the revised manuscript we leave this to the user's criteria, they have now all the information to know if the dataset is suitable or not for their purposes.

- **L592** please remove, your dataset is not purely observational  
Removed

Fig. 6 (see also Sect. 1.3)

Figure 6 (new figure 7) has been completely remade accounting for the changes in the methodology due to kriging, it now considers a much larger sample of 74 reference and benchmark glaciers and now uses as statistical metrics the mean and the standard deviation of residuals. Many of the following reviewers comments are therefore not relevant anymore.

- maybe add in the legend the amount of considered glacier anomalies for each glacier and the region where they are located in!

We do not see a simple and visually neat way to add that information in the figure for 74 glaciers. This information is available in the metadata file.

- Fig. 6a-d: Please adapt all subplots to have the same scale on the x-axis and y-axis, with equal tick labels and lengths. E.g. in python, you can set: `ax.setaspect('equal')`. I believe this would help a lot to correctly interpret the plots (and would help to understand that all grey dashed lines are 1:1 lines).

We disagree to use same y-axis. The mean error can be positive or negative and the standard deviation is positive, using same y-axis would make us loose too much space and is not a critical aspect in this figure.

- does it work better for those glaciers that have a lot of glacier anomalies nearby?

Results of leave-block-out cross validation show that random errors increase with distant samples. See section 5.3 in the revised manuscript.

- Fig. 6d: Can you please clarify clearly the meaning of the y-axis (more details on that in Sect. 1.3).

Done

- caption L419: I find it hard to interpret "std-diff"? Does every glacier count the same? Does it basically describe whether the differences are similarly large for the different glaciers?

Not relevant for new figure

- caption L422: mass change "trend" (not std. dev)

Changed

- caption L423: mass change "standard deviation" (not trend)

Changed

- caption L424: x-y descriptions does not display the actual Fig. 6d. As all other figures represent on the y-axis the leave-one-out cross-validation results, it would be best to exchange x and y-axes in Fig. 6d.

Not relevant for new figure

Fig. 7

- maybe add the uncertainties of the "leave-one-out" time series

Done

- caption L459: maybe add the word "observed" here. If I understand it correctly the time series that is actually used in the dataset (i.e., e.g. for HEF Fig. 2d) is not shown here, or? Or is it in case of these reference glaciers the same?

It is not clear what the reviewer means here

- caption L459-460: caption description of right and left is reversed! Eventually show the other non-selected reference glaciers in the supplements or appendix

Well spotted, Thanks

## 2.5 Data and Code availability

see Sect. 1.7

### 1.6 Conclusions

#### Regarding the Conclusions:

The conclusion has been fully rewritten accounting for reviewer #1 comments stated here below and reviewer #2 comments.

- **L628** Here again, I would prefer to remove that statement of "independence" and of "purely observational nature".
- **L629-630** With the current cross-validation analysis and figures that I have, I can not yet conclude that. Please recheck, once you refined the cross-validation (see Sect. 1.3).
- **L645-end** These are very broad use cases, maybe a bit more concrete and nuanced use cases would help to clarify what this new dataset can do (i.e., where it adds value) compared to other existing datasets.
- **L657** replace "The" with "the"

The last 4 points are not relevant in the revised manuscript. We removed statements on uncertainties and on use cases.
